# Supplementary material
Source: Springer Nature journal article supplement (https://www.springermedizin.de/resource/supplementary/12891_2005_169_MOESM1_ESM.pdf/9510654)
Supplement: MOESM1 [file 9510654]

# Additional file 1

## 2x2 contingency tables of the results of the index (clinical) test by lumbar region, versus the results of the reference standard.

Accuracy of PAIVMs for detecting rotation LSI within a lumbar region (upper and lower lumbar regions)

|               | Reference standard + | Reference standard - | Row totals |                       |       |               |
|---------------|----------------------|----------------------|------------|-----------------------|-------|---------------|
| Dx test +     | 3                    | 24                   | 27         | Sensitivity (95%CI) = | 0.333 | (0.121 0.646) |
| Dx test -     | 6                    | 173                  | 179        | Specificity (95%CI) = | 0.878 | (0.825 0.917) |
| Column totals | 9                    | 197                  | 206        | LR - (95%CI) =        | 0.76  | (0.48 1.21)   |
|               |                      |                      |            | LR+ (95%CI) =         | 2.74  | (1.01 7.42)   |

Accuracy of Flexion PPIVMs for detecting rotation LSI within a lumbar region (upper and lower lumbar regions)

|               | Reference standard + | Reference standard - | Row totals |                       |       |               |
|---------------|----------------------|----------------------|------------|-----------------------|-------|---------------|
| Dx test +     | 0.5*                 | 2.5                  | 3          | Sensitivity (95%CI) = | 0.050 | (0.005 0.345) |
| Dx test -     | 9.5                  | 203.5                | 213        | Specificity (95%CI) = | 0.988 | (0.962 0.996) |
| Column totals | 10                   | 206                  | 216        | LR - (95%CI) =        | 0.96  | (0.83 1.11)   |
|               |                      |                      |            | LR+ (95%CI) =         | 4.12  | (0.21 80.25)  |

Accuracy of Extension PPIVMs for detecting rotation LSI within a lumbar region (upper and lower lumbar regions)

|               | Reference standard + | Reference standard - | Row totals |                       |       |               |
|---------------|----------------------|----------------------|------------|-----------------------|-------|---------------|
| Dx test +     | 2                    | 5                    | 7          | Sensitivity (95%CI) = | 0.222 | (0.063 0.547) |
| Dx test -     | 7                    | 184                  | 191        | Specificity (95%CI) = | 0.974 | (0.940 0.989) |
| Column totals | 9                    | 189                  | 198        | LR - (95%CI) =        | 0.80  | (0.56 1.13)   |
|               |                      |                      |            | LR+ (95%CI) =         | 8.40  | (1.88 37.55)  |

Accuracy of PAIVMs for detecting translation LSI within a lumbar region (upper and lower lumbar regions)

|               | Reference standard + | Reference standard - | Row totals |                       |       |               |
|---------------|----------------------|----------------------|------------|-----------------------|-------|---------------|
| Dx test +     | 6                    | 21                   | 27         | Sensitivity (95%CI) = | 0.286 | (0.138 0.500) |
| Dx test -     | 15                   | 164                  | 179        | Specificity (95%CI) = | 0.886 | (0.833 0.925) |
| Column totals | 21                   | 185                  | 206        | LR - (95%CI) =        | 0.81  | (0.61 1.06)   |
|               |                      |                      |            | LR+ (95%CI) =         | 2.52  | (1.15 5.53)   |

Accuracy of Flexion PPIVMs for detecting translation LSI within a lumbar region (upper and lower lumbar regions)

|               | Reference standard + | Reference standard - | Row totals |                       |       |               |
|---------------|----------------------|----------------------|------------|-----------------------|-------|---------------|
| Dx test +     | 1                    | 1                    | 2          | Sensitivity (95%CI) = | 0.045 | (0.008 0.218) |
| Dx test -     | 21                   | 191                  | 212        | Specificity (95%CI) = | 0.995 | (0.971 0.999) |
| Column totals | 22                   | 192                  | 214        | LR - (95%CI) =        | 0.96  | (0.88 1.05)   |
|               |                      |                      |            | LR+ (95%CI) =         | 8.73  | (0.57 134.69) |

Accuracy of Extension PPIVMs for detecting translation LSI within a lumbar region (upper and lower lumbar regions)

|               | Reference standard + | Reference standard - | Row totals |                       |       |               |
|---------------|----------------------|----------------------|------------|-----------------------|-------|---------------|
| Dx test +     | 3                    | 4                    | 7          | Sensitivity (95%CI) = | 0.158 | (0.055 0.376) |
| Dx test -     | 16                   | 175                  | 191        | Specificity (95%CI) = | 0.978 | (0.944 0.991) |
| Column totals | 19                   | 179                  | 198        | LR - (95%CI) =        | 0.86  | (0.71 1.05)   |
|               |                      |                      |            | LR+ (95%CI) =         | 7.07  | (1.71 29.24)  |

Notes: PAIVMs = central posteroanterior passive accessory intervertebral motion tests; PPIVMs = passive physiological intervertebral motion tests; LSI = lumbar segmental instability; Dx test = result of the clinical test; CI = 95% confidence interval; LR+ = likelihood ratio for a positive test; LR- = likelihood ratio for a negative test. Row and column totals differ from expected total (246) due to listwise deletion in the event of any missing values in either clinical or radiographic data. \*0.5 added to all cells in the event of a zero in any cell.

## 2x2 contingency tables of the results of the index (clinical) test by lumbar segmental level, versus the results of the reference standard

Accuracy of PAIVMs for detecting rotation LSI by segment

|               | Reference standard + | Reference standard - | Row totals |                       |       |               |
|---------------|----------------------|----------------------|------------|-----------------------|-------|---------------|
| Dx test +     | 1                    | 23                   | 24         | Sensitivity (95%CI) = | 0.167 | (0.030 0.564) |
| Dx test -     | 5                    | 405                  | 410        | Specificity (95%CI) = | 0.946 | (0.921 0.964) |
| Column totals | 6                    | 428                  | 434        | LR - (95%CI) =        | 0.88  | (0.62 1.26)   |
|               |                      |                      |            | LR+ (95%CI) =         | 3.10  | (0.50 19.39)  |

Accuracy of Flexion PPIVMs for detecting rotation LSI by segment

|               | Reference standard + | Reference standard - | Row totals |                       |       |               |
|---------------|----------------------|----------------------|------------|-----------------------|-------|---------------|
| Dx test +     | 0.5*                 | 2.5                  | 3          | Sensitivity (95%CI) = | 0.071 | (0.008 0.439) |
| Dx test -     | 6.5                  | 442.5                | 449        | Specificity (95%CI) = | 0.994 | (0.982 0.998) |
| Column totals | 7                    | 445                  | 452        | LR - (95%CI) =        | 0.93  | (0.76 1.15)   |
|               |                      |                      |            | LR+ (95%CI) =         | 12.71 | (0.67 241.27) |

Accuracy of Extension PPIVMs for detecting rotation LSI by segment

|               | Reference standard + | Reference standard - | Row totals |                       |       |               |
|---------------|----------------------|----------------------|------------|-----------------------|-------|---------------|
| Dx test +     | 0.5*                 | 4.5                  | 5          | Sensitivity (95%CI) = | 0.071 | (0.008 0.439) |
| Dx test -     | 6.5                  | 409.5                | 416        | Specificity (95%CI) = | 0.989 | (0.974 0.996) |
| Column totals | 7                    | 414                  | 421        | LR - (95%CI) =        | 0.940 | (0.76 1.15)   |
|               |                      |                      |            | LR+ (95%CI) =         | 6.75  | (0.39 110.76) |

Accuracy of PAIVMs for detecting translation LSI by segment

|               | Reference standard + | Reference standard - | Row totals |                       |       |               |
|---------------|----------------------|----------------------|------------|-----------------------|-------|---------------|
| Dx test +     | 3                    | 21                   | 24         | Sensitivity (95%CI) = | 0.188 | (0.066 0.430) |
| Dx test -     | 13                   | 397                  | 410        | Specificity (95%CI) = | 0.950 | (0.924 0.967) |
| Column totals | 16                   | 418                  | 434        | LR - (95%CI) =        | 0.86  | (0.68 1.08)   |
|               |                      |                      |            | LR+ (95%CI) =         | 3.73  | (1.24 11.23)  |

Accuracy of Flexion PPIVMs for detecting translation LSI by segment

|               | Reference standard + | Reference standard - | Row totals |                       |       |               |
|---------------|----------------------|----------------------|------------|-----------------------|-------|---------------|
| Dx test +     | 0.5*                 | 2.5                  | 3          | Sensitivity (95%CI) = | 0.028 | (0.003 0.219) |
| Dx test -     | 17.5                 | 431.5                | 449        | Specificity (95%CI) = | 0.994 | (0.982 0.998) |
| Column totals | 18                   | 434                  | 452        | LR - (95%CI) =        | 0.98  | (0.90 1.06)   |
|               |                      |                      |            | LR+ (95%CI) =         | 4.82  | (0.24 96.82)  |

Accuracy of Extension PPIVMs for detecting translation LSI by segment

|               | Reference standard + | Reference standard - | Row totals |                       |       |               |
|---------------|----------------------|----------------------|------------|-----------------------|-------|---------------|
| Dx test +     | 0.5*                 | 0.5                  | 1          | Sensitivity (95%CI) = | 0.033 | (0.003 0.253) |
| Dx test -     | 14.5                 | 401.5                | 416        | Specificity (95%CI) = | 0.999 | (0.988 1.000) |
| Column totals | 15                   | 402                  | 417        | LR - (95%CI) =        | 0.97  | (0.88 1.06)   |
|               |                      |                      |            | LR+ (95%CI) =         | 26.8  | (0.55 1305.5) |

Notes: PAIVMs = central posteroanterior passive accessory intervertebral motion tests; PPIVMs = passive physiological intervertebral motion tests; LSI = lumbar segmental instability; Dx test = result of the clinical test; CI = 95% confidence interval; LR+ = likelihood ratio for a positive test; LR- = likelihood ratio for a negative test. Row and column totals differ from expected total (246) due to listwise deletion in the event of any missing values in either clinical or radiographic data. \*0.5 added to all cells in the event of a zero in any cell.
